# Supplementary material for: Fluorescence and visual sensing of nitroaromatic explosives using electron rich discrete fluorophores
Source: Royal Society of Chemistry journal article supplement (doi:10.1039/c1jm10406c), 2011-01-01
Supplement: c1jm10406c.pdf [file c1jm10406c.pdf]

## Supporting information

### Fluorescence and visual sensing of nitroaromatic explosives using electron rich discrete fluorophores

Sankarasekaran Shanmugaraju\*, Sachin A. Joshi, and Partha Sarathi Mukherjee\*

*Department of Inorganic and Physical Chemistry, Indian Institute of Science, Bangalore-560 012, India. Fax: 91-80-2360-1552; Tel; 91-80-2293-3352*

*E-mail(s.s) : [shanmugam@ipc.iisc.ernet.in](mailto:shanmugam@ipc.iisc.ernet.in)*

*E-mail(p.s.m): [psm@ipc.iisc.ernet.in](mailto:psm@ipc.iisc.ernet.in)*

**Materials and methods.** All the fluorophores (**1-5**) were synthesized under dry nitrogen atmosphere using standard Schlenk technique. Triethylamine was dried over sodium/KOH and distilled freshly under nitrogen atmosphere. All the solvents used for photophysical studies were of spectroscopy grade. 1,4-diiodobenzene, 4,4'-biphenyldibromide, 3,6-dibromocarbazole, 9,10-dibromoanthracene, trimethylsilylacetylene (TMS) were purchased from commercial sources and used without further purification. 1,3,6,8-tetrabromopyrene,<sup>1</sup> 1,4-bis[trimethylsilylethynyl]benzene<sup>2</sup> (**1**), 3,6-bis[trimethylsilylethynyl]carbazole<sup>3</sup> (**3**), 1,3,6,8-tetrakis[trimethylsilylethynyl]pyrene<sup>1</sup> (**5**) were synthesized following the reported procedures. All the nitroaromatic compounds (NAC) and other quenchers including benzoic acid (BA), benzoquinone (BQ), 4-methoxybenzoic acid (4-MeOBA) were of analytical grade and used directly without further purification [For the above references see in main text].

**Caution!:** TNT and other nitroaromatic compounds used in the present study are highly explosive and should be handled only in small quantity.

NMR spectra were recorded on a Bruker 400 MHz spectrometer. The chemical shifts ( $\delta$ ) in  $^1\text{H}$  NMR spectra are reported in ppm relative to tetramethylsilane ( $\text{Me}_4\text{Si}$ ) as internal standard (0.0 ppm) or proton resonance resulting from incomplete deuteration of the NMR solvents:  $\text{CDCl}_3$  (7.26).  $^{13}\text{C}$  NMR were recorded at 75 MHz, and the chemical shifts ( $\delta$ ) are reported in ppm relative to external  $\text{CDCl}_3$  at 77.8-77.2 ppm. IR spectra were recorded on a Bruker ALPHA FT-IR spectrometer. Electronic absorption spectra were recorded on a Perkin Elmer LAMBDA 750 UV/visible spectrophotometer. Fluorescence emission studies were carried out on HORIBA JOBIN YVON Fluoromax-4 spectrometer. Thin-film for solid state fluorescence quenching study was made in PRS 400 spin-coater.

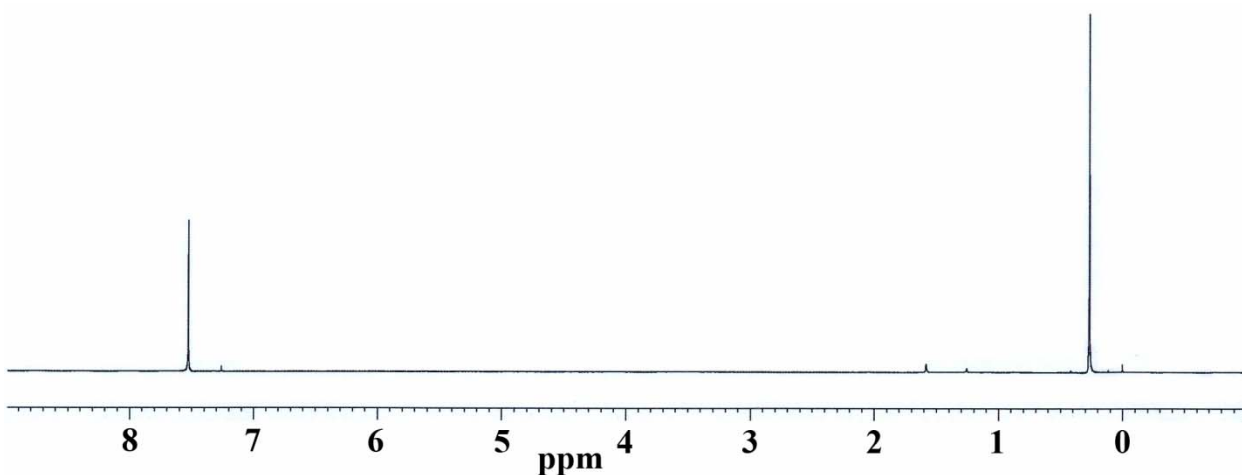

**Fig.S1.**  $^1\text{H}$  NMR spectrum of **2** in  $\text{CDCl}_3$ .

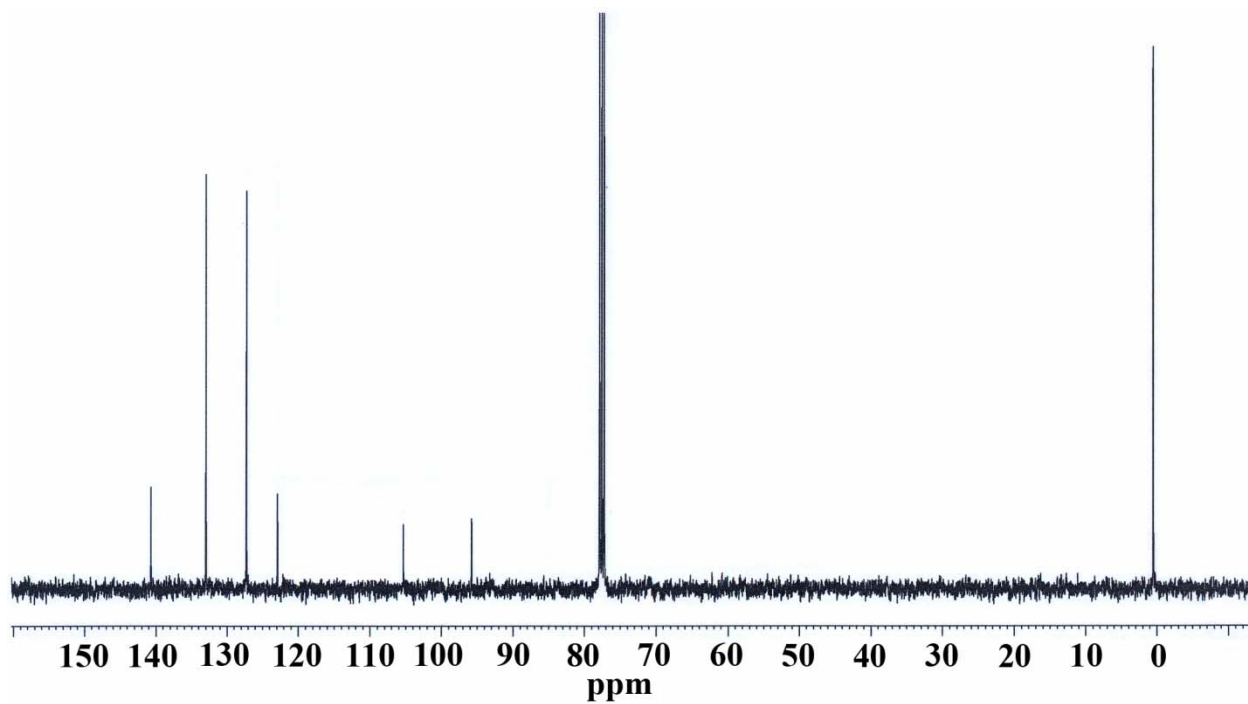

**Fig. S2.**  $^{13}\text{C}$  NMR spectrum of **2** in  $\text{CDCl}_3$ .

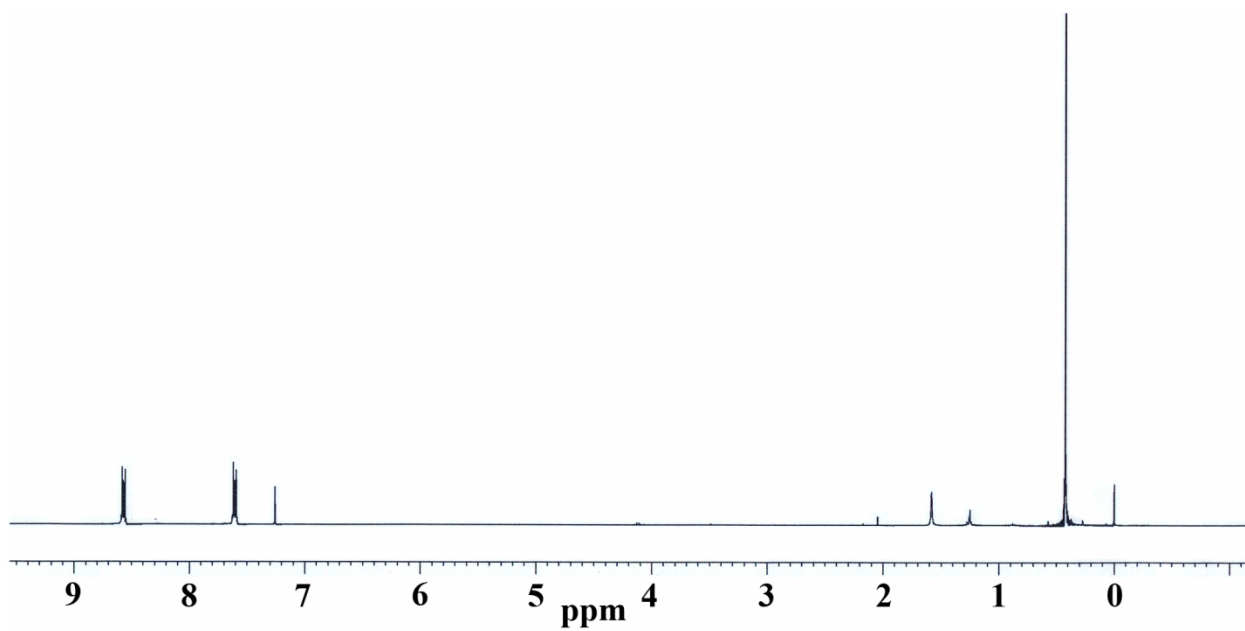

**Fig. S3.**  $^1\text{H}$  NMR spectrum of **4** in  $\text{CDCl}_3$ .

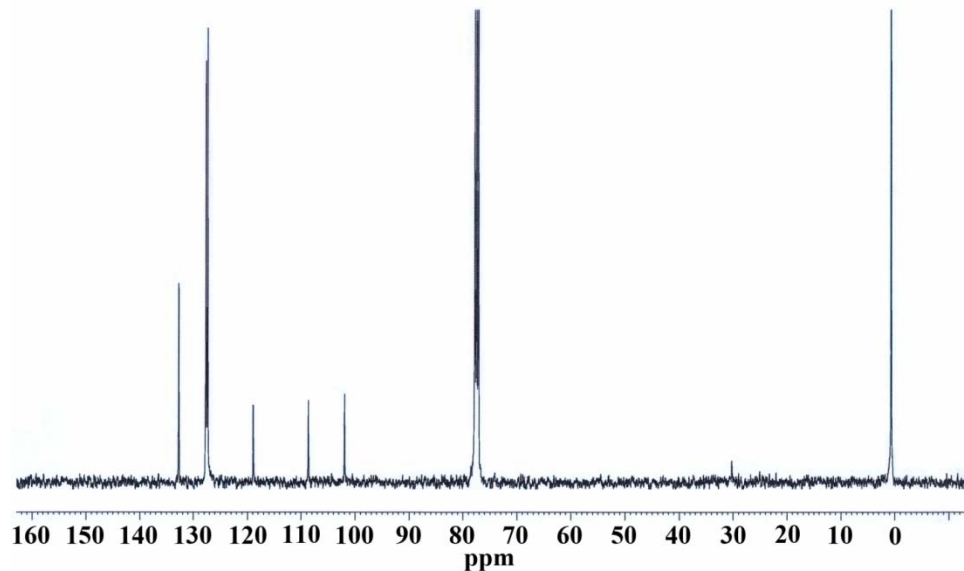

**Fig. S4.**  $^{13}\text{C}$  NMR spectrum of **4** in  $\text{CDCl}_3$ .

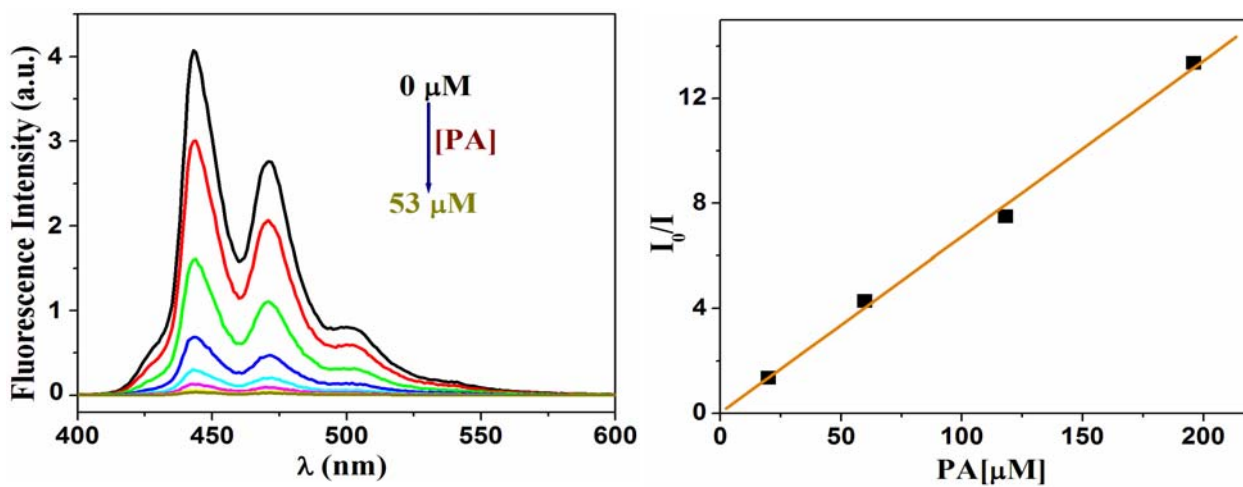

**Fig. S5.** Fluorescence quenching (left) of fluorophore **4** ( $10\ \mu\text{M}$ ) with picric acid in chloroform solution ( $\lambda_{\text{ex}} = 270\ \text{nm}$ , excitation and emission slit width is  $1\ \text{nm}$ ) and obtained Stern-Volmer plot (right).

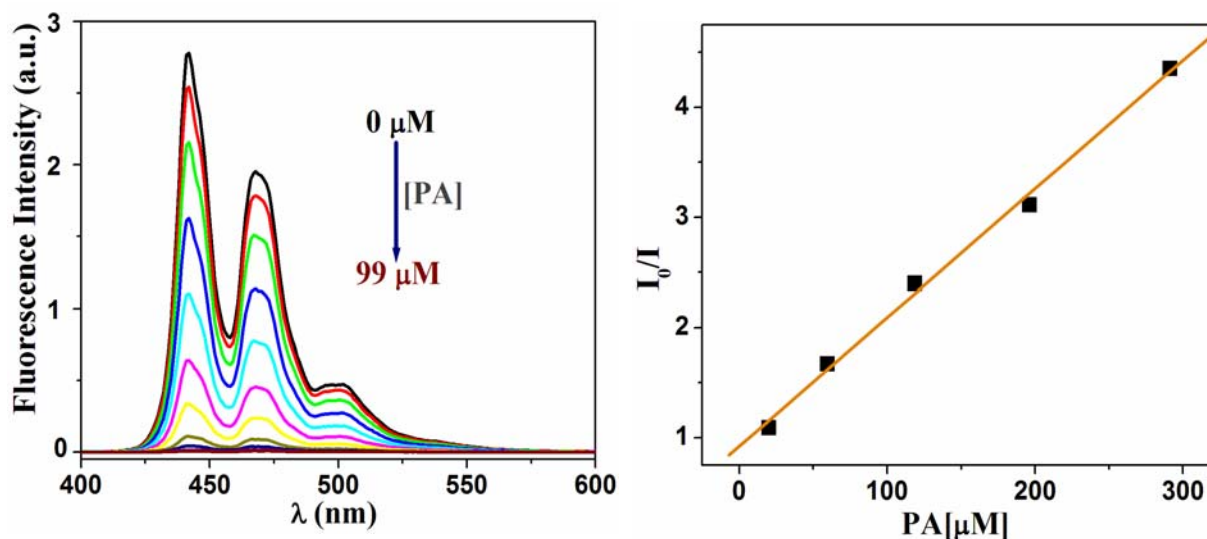

**Fig. S6.** Fluorescence quenching (left) of fluorophore **5** (10  $\mu\text{M}$ ) with picric acid in chloroform solution ( $\lambda_{\text{ex}} = 316$  nm, excitation and emission slit width is 1 nm) and obtained Stern-Volmer plot (right).

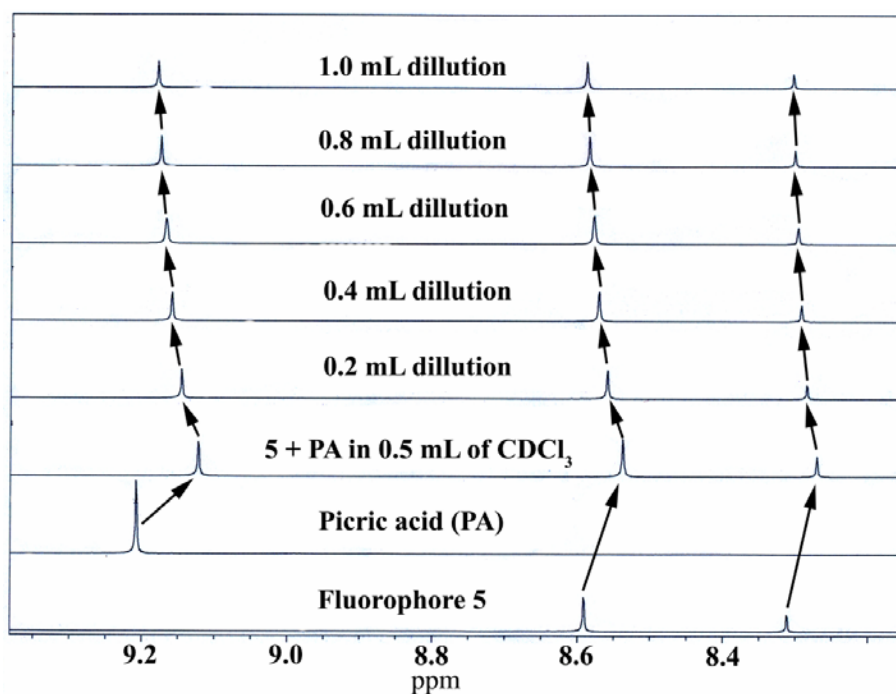

**Fig.S7.** Partial  $^1\text{H}$  NMR spectra for the charge transfer complex formation of fluorophore **5** and picric acid (PA) taken  $\text{CDCl}_3$ . Upon further dilution of charge-transfer complex exhibited a

significant downfield shifting of resonance corresponding to **5** and PA (arrow indicates the shifting of peak position).

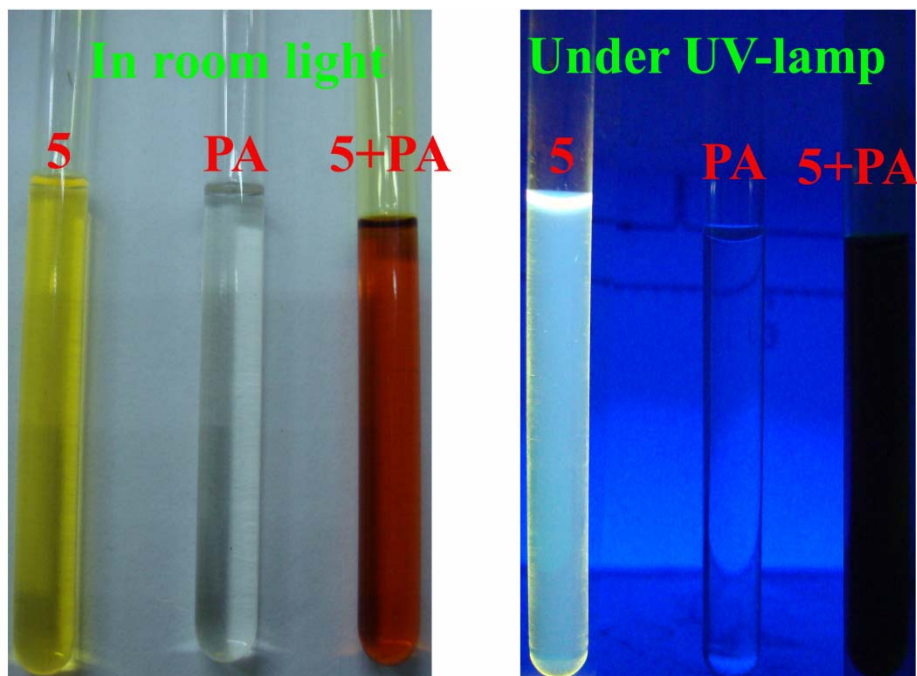

**Fig.S8.** Visual color changes observed upon mixing of fluorophore **5** in  $\text{CDCl}_3$  with increasing quantity of picric acid (PA) in  $\text{CDCl}_3$  (left; in room light and right; under hand hold UV light).

Cartesian coordinates for the DFT calculation of complex **4.PA**

|   |             |             |             |
|---|-------------|-------------|-------------|
| C | -0.72953800 | 2.46861400  | -2.29372300 |
| C | -1.37257500 | 1.35158200  | -1.86567700 |
| C | -0.64618100 | 0.19590100  | -1.48117000 |
| C | 0.77258900  | 0.22332100  | -1.55335000 |
| C | 1.40830900  | 1.40877300  | -2.00053700 |
| C | 0.68000600  | 2.49473300  | -2.36749000 |
| C | -1.30009100 | -0.95826300 | -1.01509700 |
| C | 1.51174300  | -0.89405100 | -1.12712900 |
| C | 0.85786400  | -2.05410600 | -0.67512400 |
| C | -0.56264200 | -2.08491400 | -0.61547000 |
| C | -1.20046800 | -3.24867000 | -0.11836500 |
| H | -2.27865600 | -3.26295800 | -0.08242200 |
| C | -0.47247400 | -4.31203500 | 0.30447400  |
| C | 0.93856100  | -4.27686500 | 0.25518300  |
| C | 1.58388000  | -3.18251400 | -0.21991400 |

|    |             |             |             |
|----|-------------|-------------|-------------|
| H  | -1.29297300 | 3.34553400  | -2.57170600 |
| H  | -2.44925500 | 1.32458100  | -1.79957700 |
| H  | 2.48596200  | 1.42782500  | -2.03830000 |
| H  | 1.17987000  | 3.39318900  | -2.69534400 |
| H  | -0.97070800 | -5.19029100 | 0.68495200  |
| H  | 1.50477200  | -5.12683200 | 0.60328800  |
| H  | 2.66115300  | -3.14552500 | -0.25485700 |
| C  | 2.92486900  | -0.81628400 | -1.07194800 |
| C  | 4.12686600  | -0.71157300 | -0.94834800 |
| C  | -2.71375400 | -0.94867700 | -0.91270800 |
| C  | -3.92179300 | -0.88005000 | -0.82893400 |
| Si | 5.90757200  | -0.45930400 | -0.57809700 |
| Si | -5.75231000 | -0.66761000 | -0.79673800 |
| C  | 5.97459100  | 0.41856600  | 1.07250200  |
| H  | 5.50325100  | -0.18267600 | 1.84881100  |
| H  | 7.00258500  | 0.60947900  | 1.37774300  |
| H  | 5.45833100  | 1.37652600  | 1.02638300  |
| C  | 6.74483600  | -2.12602800 | -0.48379400 |
| H  | 6.29675300  | -2.74831700 | 0.28830100  |
| H  | 6.67078300  | -2.65943000 | -1.42939100 |
| H  | 7.80191500  | -2.01126900 | -0.24764800 |
| C  | 6.66206600  | 0.58917700  | -1.92695500 |
| H  | 6.59033400  | 0.09791500  | -2.89524600 |
| H  | 6.16280500  | 1.55312100  | -2.00247400 |
| H  | 7.71597200  | 0.77530900  | -1.72426700 |
| C  | -6.38249100 | -0.81470300 | 0.95168800  |
| H  | -5.94453200 | -0.05446600 | 1.59294700  |
| H  | -7.46555800 | -0.69606900 | 0.96531800  |
| H  | -6.14624900 | -1.78662800 | 1.38011600  |
| C  | -6.49249600 | -2.00115900 | -1.87971400 |
| H  | -6.11603300 | -1.93770000 | -2.89864100 |
| H  | -6.26125000 | -2.99408400 | -1.49908200 |
| H  | -7.57686400 | -1.90332100 | -1.91691400 |
| C  | -6.11184100 | 1.02701900  | -1.49654500 |
| H  | -5.63840200 | 1.79850300  | -0.89287600 |
| H  | -5.74552000 | 1.12018300  | -2.51720800 |
| H  | -7.18370900 | 1.22086800  | -1.50737400 |
| C  | 0.50288900  | 0.19890900  | 1.83795200  |
| C  | -0.85900200 | 0.07037100  | 1.98735600  |
| C  | 1.10974600  | 1.37686500  | 1.34243200  |
| C  | -1.66456900 | 1.12432300  | 1.63541600  |
| H  | -1.27609000 | -0.84865800 | 2.36291200  |
| C  | 0.22685600  | 2.42682600  | 1.01982500  |
| C  | -1.13656700 | 2.29766500  | 1.14536600  |
| H  | -1.77521000 | 3.11575100  | 0.86003900  |
| O  | 2.39219700  | 1.50371500  | 1.16530100  |
| H  | 2.82035000  | 0.65053000  | 1.38136100  |
| N  | 0.70614600  | 3.70435000  | 0.52268200  |
| N  | 1.30078300  | -0.93652700 | 2.22961500  |
| N  | -3.09429000 | 0.98629700  | 1.77791100  |
| O  | -0.13592000 | 4.48175600  | 0.13232400  |
| O  | 1.88982000  | 3.91877100  | 0.53235200  |
| O  | -3.78933600 | 1.83399500  | 1.26847800  |
| O  | -3.49503500 | 0.03183000  | 2.39787600  |
| O  | 0.74200600  | -1.90175700 | 2.67126300  |
| O  | 2.51488100  | -0.86076800 | 2.09692900  |

Cartesian coordinates for the DFT calculation of complex **5.PA**

|    |             |             |             |
|----|-------------|-------------|-------------|
| C  | 3.11616600  | 0.11287900  | -1.37391000 |
| C  | 2.45560200  | -1.10397500 | -1.30184100 |
| C  | 1.05001400  | -1.13901300 | -1.22165400 |
| C  | 0.33557000  | 0.07641400  | -1.16121900 |
| C  | 1.01905200  | 1.31010700  | -1.21960900 |
| C  | 2.42204700  | 1.31339700  | -1.35008500 |
| C  | 0.33683800  | -2.36518000 | -1.13432000 |
| C  | -1.07748500 | 0.05532900  | -1.00268000 |
| C  | -1.75732700 | -1.17921400 | -0.92676700 |
| C  | -1.00610700 | -2.38415800 | -0.99647300 |
| C  | -3.15420600 | -1.18280300 | -0.76592800 |
| C  | -3.83931500 | 0.01834800  | -0.65687000 |
| C  | -3.17845700 | 1.23616000  | -0.69428400 |
| C  | -1.78311900 | 1.27071300  | -0.87535600 |
| C  | -1.05936700 | 2.49353600  | -0.89534500 |
| C  | 0.28022500  | 2.51506700  | -1.06987400 |
| H  | 0.82142300  | 3.44818300  | -1.08618100 |
| H  | -1.61295700 | 3.41073700  | -0.76907300 |
| H  | 0.89770100  | -3.28600000 | -1.18108200 |
| H  | 4.19242900  | 0.12895300  | -1.42110900 |
| H  | -1.53906000 | -3.31991600 | -0.93136300 |
| H  | -4.90756700 | 0.00388000  | -0.51889300 |
| C  | -4.50344400 | -3.43634600 | -0.62636800 |
| C  | -3.87561500 | -2.40231900 | -0.69276800 |
| C  | -3.91933700 | 2.43635300  | -0.54110300 |
| C  | -4.55854300 | 3.45653000  | -0.40770400 |
| C  | 3.14241200  | 2.53399600  | -1.36224900 |
| C  | 3.75510700  | 3.57597200  | -1.29198800 |
| C  | 3.19820300  | -2.30891700 | -1.20748800 |
| C  | 3.80216100  | -3.34948900 | -1.06075500 |
| Si | -5.54301000 | 4.98446200  | -0.15767300 |
| Si | 4.62120500  | -4.96773200 | -0.76592700 |
| Si | -5.48299800 | -4.98304700 | -0.50546200 |
| Si | 4.63718300  | 5.14439200  | -0.92632300 |
| C  | -4.54977100 | 6.15528400  | 0.90794500  |
| H  | -3.61193000 | 6.42848700  | 0.42819800  |
| H  | -5.10740100 | 7.07206100  | 1.09561800  |
| H  | -4.31287200 | 5.70415500  | 1.86931400  |
| C  | -5.89020900 | 5.75185100  | -1.82675300 |
| H  | -6.45312200 | 5.07238600  | -2.46353000 |
| H  | -6.47305200 | 6.66536600  | -1.71476600 |
| H  | -4.96767000 | 6.00637500  | -2.34467400 |
| C  | -7.14004200 | 4.51658200  | 0.69258200  |
| H  | -7.71845200 | 3.81965900  | 0.08937200  |
| H  | -6.94842900 | 4.04574800  | 1.65461800  |
| H  | -7.75575600 | 5.39800700  | 0.86752400  |
| C  | 5.52030600  | 5.73380400  | -2.46528000 |
| H  | 4.82111000  | 5.91646400  | -3.27889400 |
| H  | 6.05319300  | 6.66319900  | -2.26797900 |
| H  | 6.24715300  | 4.99985100  | -2.80773000 |
| C  | 3.34692000  | 6.38097400  | -0.38026500 |



|   |             |             |             |
|---|-------------|-------------|-------------|
| H | 2.80557500  | 5.99929700  | 0.48347200  |
| H | 3.80553300  | 7.32844400  | -0.10025500 |
| H | 2.62552900  | 6.57946700  | -1.17070500 |
| C | 5.84052700  | 4.79479000  | 0.45628200  |
| H | 6.62736600  | 4.11591000  | 0.13358200  |
| H | 6.30947600  | 5.71205000  | 0.80994400  |
| H | 5.32235100  | 4.32661900  | 1.29017200  |
| C | 5.40151300  | -5.53965300 | -2.36507400 |
| H | 5.88188300  | -6.50836700 | -2.23266600 |
| H | 4.65727000  | -5.64095700 | -3.15239500 |
| H | 6.15734000  | -4.83659600 | -2.70938400 |
| C | 5.92580700  | -4.74774100 | 0.55331000  |
| H | 6.65679600  | -3.99348900 | 0.26886500  |
| H | 5.48302700  | -4.45038200 | 1.50152600  |
| H | 6.45964400  | -5.68318300 | 0.71703900  |
| C | 3.29560200  | -6.15469900 | -0.19810400 |
| H | 2.78020300  | -5.76064200 | 0.67560700  |
| H | 2.55550100  | -6.32066900 | -0.97885100 |
| H | 3.72260000  | -7.12097700 | 0.06709000  |
| C | -4.89641400 | -5.93922200 | 0.98970300  |
| H | -5.46101200 | -6.86440500 | 1.09898200  |
| H | -3.84310200 | -6.19930000 | 0.90576200  |
| H | -5.02477600 | -5.35957200 | 1.90154900  |
| C | -5.21789300 | -5.97956400 | -2.06476400 |
| H | -5.78713800 | -6.90763000 | -2.02815100 |
| H | -5.53778200 | -5.42603000 | -2.94526900 |
| H | -4.16885300 | -6.23727800 | -2.19622900 |
| C | -7.28436000 | -4.52028000 | -0.32219500 |
| H | -7.44783100 | -3.92175600 | 0.57171100  |
| H | -7.63237000 | -3.94467800 | -1.17755900 |
| H | -7.90450900 | -5.41250700 | -0.24525700 |
| H | 0.32218600  | 2.26392700  | 2.13346800  |
| C | 0.61035000  | 1.22671300  | 2.12403800  |
| C | -0.33915400 | 0.23378000  | 2.20146500  |
| C | 1.93596600  | 0.88869500  | 1.99099500  |
| C | 0.00402900  | -1.09309900 | 2.13373700  |
| C | 2.36453400  | -0.45323200 | 1.96090500  |
| C | 1.33803200  | -1.42357100 | 2.04550400  |
| H | -0.74867100 | -1.86359900 | 2.15106700  |
| O | 3.62536800  | -0.75094900 | 1.82941700  |
| H | 3.70947600  | -1.72395500 | 1.80559500  |
| N | 2.86284900  | 1.99827900  | 1.82362700  |
| N | -1.73592600 | 0.59966500  | 2.30580600  |
| N | 1.64935100  | -2.82981400 | 1.98759700  |
| O | 2.36909500  | 3.09858200  | 1.72242800  |
| O | 4.04117400  | 1.76134000  | 1.78478400  |
| O | 2.82542200  | -3.16050800 | 2.04752100  |
| O | 0.74495400  | -3.61349500 | 1.89608400  |
| O | -1.99340700 | 1.77471000  | 2.40400500  |
| O | -2.54243100 | -0.29793700 | 2.28747700  |

## References:

- (1) (a) G. Venkataramana and S. Sankararaman, *Eur. J. Org. Chem.*, 2005, 4162. (b) V. Narayanan, S. Sankararaman and H. Hopf, *Eur. J. Org. Chem.*, 2005, 2740. (c) A. Llanes-

- Pallas, C. A. Palma, L. Piot, A. Belbakra, A. Listorti, M. Prato, P. Samori, N. Armaroli and D. Bonifazi, *J. Am. Chem. Soc.*, 2009, **131**, 509. (d) T. Shyamala, S. Sankararaman and A. K. Mishra, *Chemical Physics* 2006, **330**, 469. (e) H. Maeda, T. Maeda, K. Mizuno, K. Fujimoto, H. Shimizu and M. Inouye, *Chem. Eur. J.*, 2006, **12**, 824. (f) S. Bernhardt, M. Kastler, V. Enkelmann, M. Baumgarten and K. Müllen, *Chem. Eur. J.*, 2006, **12**, 6117.
- (2) M. J. Plater, J. P. Sinclair, S. Aiken, T. Gelbrich and M. B. Hursthouse, *Tetrahedron* 2004, **60**, 6385.
- (3) S. Shanmugaraju, A. K. Bar, K.-W. Chi and P. S. Mukherjee, *Organometallics* 2010, **29**, 2971.
